1 **Neutralizing activity of Sputnik V vaccine sera against SARS-CoV-2 variants**

2

3 Satoshi Ikegame<sup>1,#</sup>, Mohammed N. A. Siddiquey<sup>2,#</sup>, Chuan-Tien Hung<sup>1</sup>, Griffin Haas<sup>1</sup>,  
4 Luca Brambilla<sup>1</sup>, Kasopefoluwa Y. Oguntuyo<sup>1</sup>, Shreyas Kowdle<sup>1</sup>, Ariel Esteban Vilardo<sup>3</sup>,  
5 Alexis Edelstein<sup>3</sup>, Claudia Perandones<sup>3,†</sup>, Jeremy P. Kamil<sup>2,†</sup>, and Benhur Lee<sup>1,†,\*</sup>

6

7 **Affiliations.**

8 1. Department of Microbiology at the Icahn School of Medicine at Mount Sinai, New  
9 York, NY 10029, USA

10 2. Department of Microbiology and Immunology, Louisiana State University Health  
11 Shreveport, Shreveport, LA 71103, USA.

12 3. National Administration of Laboratories and Health Institutes of Argentina (ANLIS) Dr.  
13 Carlos G. Malbrán, Buenos Aires, Argentina

14 # These authors contributed equally to the study.

15 † Senior authors

16 \* Correspondence to: Benhur Lee, [benhur.lee@mssm.edu](mailto:benhur.lee@mssm.edu)

17

18 **Competing interests:** B.L. and K.Y.O. are named inventors on a patent filed by the  
19 Icahn School of Medicine for some of the materials used in this work. J.P.K. is a  
20 consultant for BioNTech (advisory panel on coronavirus variants).

21

22

23

24 **ABSTRACT.**

25 The novel pandemic betacoronavirus, severe acute respiratory syndrome coronavirus 2  
26 (SARS-CoV-2), has infected at least 120 million people since its identification as the  
27 cause of a December 2019 viral pneumonia outbreak in Wuhan, China. Despite the  
28 unprecedented pace of vaccine development, with six vaccines already in use  
29 worldwide, the emergence of SARS-CoV-2 ‘variants of concern’ (VOC) across diverse  
30 geographic locales suggests herd immunity may fail to eliminate the virus. All three  
31 officially designated VOC carry Spike (S) polymorphisms thought to enable escape  
32 from neutralizing antibodies elicited during initial waves of the pandemic. Here, we  
33 characterize the biological consequences of the ensemble of S mutations present in  
34 VOC lineages B.1.1.7 (501Y.V1) and B.1.351 (501Y.V2). Using a replication-competent  
35 EGFP-reporter vesicular stomatitis virus (VSV) system, rcVSV-CoV2-S, which encodes  
36 S from SARS coronavirus 2 in place of VSV-G, and coupled with a clonal HEK-293T  
37 ACE2 TMPRSS2 cell line optimized for highly efficient S-mediated infection, we  
38 determined that only 1 out of 12 serum samples from a cohort of recipients of the  
39 Gamaleya Sputnik V Ad26 / Ad5 vaccine showed effective neutralization ( $IC_{90}$ ) of  
40 rcVSV-CoV2-S: B.1.351 at full serum strength. The same set of sera efficiently  
41 neutralized S from B.1.1.7 and showed only moderately reduced activity against S  
42 carrying the E484K substitution alone. Taken together, our data suggest that control of  
43 some emergent SARS-CoV-2 variants may benefit from updated vaccines.

44

## 45 INTRODUCTION.

46 In the 15 months since its emergence in late 2019 <sup>1</sup>, SARS-CoV-2 has caused over 131  
47 million confirmed COVID-19 cases worldwide, leading to at least 2.85 million deaths <sup>2</sup>.  
48 SARS-CoV-2 is closely related to two other zoonotic betacoronaviruses, MERS-CoV  
49 and SARS-CoV, that also cause life-threatening respiratory infections <sup>3</sup>.

50 This global health emergency has spurred the development of COVID-19 preventive  
51 vaccines at an unprecedented pace. Six are already authorized for human use across  
52 the globe <sup>4-9</sup>. These vaccines focus on the SARS-CoV-2 spike protein (S), due to its  
53 critical roles in cell entry. Indeed, the presence of serum neutralizing antibodies  
54 directed at S correlate strongly with protection against COVID-19 <sup>10,11</sup>. Although these  
55 six vaccines are efficacious, the recent emergence of novel SARS-CoV-2 variants has  
56 reignited concerns that the pandemic may not be so easily brought under control.

57 In December 2020, the United Kingdom reported the sudden emergence of a novel  
58 SARS-CoV-2 lineage, termed B.1.1.7 (501Y.V1, VOC 202012/01), which was  
59 designated as the first SARS-CoV-2 variant of concern (VOC) . The lineage had rapidly  
60 increased in prevalence since first being detected in November 2020 <sup>12</sup>. Its genome  
61 showed an unusually high number of non-synonymous substitutions and deletions,  
62 including eight in the S gene, suggesting a substantial degree of host adaptation that  
63 may have occurred during prolonged infection of an immunocompromised person <sup>13</sup>.  
64 The B.1.1.7 lineage has now been shown to exhibit enhanced transmissibility <sup>14</sup> as well  
65 as an increased case fatality rate <sup>15,16</sup>.

66 Soon afterwards, two additional SARS-CoV-2 VOC, B.1.351 and P.1, were  
67 reported from S. Africa and Brazil, respectively, which each showed substantial escape  
68 from neutralizing antibodies elicited by first wave pandemic viruses, leading to  
69 documented cases of re-infection <sup>17-19</sup>. The S genes of B.1.351 and P.1 viruses each  
70 carry a number of mutations, but include three in the receptor binding domain (RBD)  
71 that are particularly notable, the S: N501Y substitution, found in B.1.1.7, alongside  
72 polymorphisms at positions 417 and 484, K417N/T and E484K. S: E484K had already  
73 been identified in multiple independent laboratories to confer escape from  
74 convalescent sera and monoclonal antibodies <sup>20-22</sup>. As expected, the P.1 and B.1.351  
75 variants escape or resist neutralization by first wave convalescent sera, as well as  
76 antibodies elicited by COVID-19 vaccines <sup>23-27</sup>.

77 Although the P.1 and B.1.351 lineages are dominant in Brazil and S. Africa,  
78 unlike B.1.1.7 they have not increased greatly in number in the United States since  
79 originally being detected here. In contrast, the E484K polymorphism is recurrently  
80 emergent, and is found in a number of other lineages that are increasing in the U.S.  
81 and other countries. For example, a B.1.526 sub-lineage carrying E484K in recent  
82 weeks has expanded more rapidly than B.1.1.7 <sup>28,29</sup>, which may be indicative of the  
83 ability of S: E484K variants to penetrate herd immunity. The P.2 lineage, originally

84 detected in Rio de Janeiro, carries only the E484K mutation in the RBD and has spread  
85 to other parts of South America, including Argentina <sup>30</sup>.

86 The six COVID-19 vaccines currently in use around the world employ different  
87 strategies, and do not all incorporate the two proline substitutions that “lock” S into the  
88 pre-fusion conformer. Vaccines that do not utilize pre-fusion “locked” S are expected  
89 to produce lower levels of neutralizing antibodies, and hence may be less efficacious  
90 against infection, even if they do protect against severe COVID-19<sup>31,32</sup>. Indeed, a two-  
91 dose regimen of the AstraZeneca ChAdOx1 based vaccine, which does not use a  
92 “locked” S, did not protect against mild-to-moderate COVID-19 in S. Africa, where  
93 93% of COVID-19 cases in trial participants were caused by the B.1.351 variant <sup>33</sup>. Like  
94 the AstraZeneca ChAdOx1 vaccine, the Sputnik V vaccine (Gam-COVID-Vac) is based  
95 on adenovirus vectored expression of a native S sequence, rather than a pre-fusion  
96 “locked” S <sup>34</sup>. Although the Sputnik V vaccine has a reported vaccine efficacy of 91.6%  
97 in the interim analysis of Phase 3 trials held in Russia between Sept 7 and Nov 24,  
98 2020, none of the VOC mentioned above nor independent lineages containing the  
99 E484K mutation were prevalent in Russia during this time period. Since the Sputnik  
100 vaccine is now in use not only in Russia, but also in countries like Argentina, Mexico,  
101 and Hungary, where some of the VOC and emerging lineages bearing the E484K  
102 mutation are more widespread, it is critical to assess the neutralizing activity of Sputnik  
103 vaccine elicited antibody responses against these cognate VOC and mutant spikes.

104 This study characterizes the neutralization activity of sera from a dozen Sputnik  
105 V vaccine recipients in Argentina. Our work was spurred by Argentina’s nascent  
106 genomic surveillance efforts, which detected multiple independent lineages with S:  
107 E484K (B.1.1.318 and P.2) and/or S: N501Y substitutions (B.1.1.7 and P.1) in common,  
108 just as Argentina had started rolling out its vaccination campaign, which commenced  
109 on Dec 29, 2020. Here, we generated isogenic replication-competent vesicular  
110 stomatitis virus bearing the prevailing wild-type (WT=D614G) SARS-CoV-2 S (rcVSV-  
111 CoV2-S), or the B.1.1.7, B.1.351 or E484K mutant S and used them in a robust virus  
112 neutralization assay. Our results show that Sputnik V vaccine sera effectively  
113 neutralized S: WT and S: B.1.1.7. viruses, albeit with highly variable titers. The same  
114 sera, however, exhibited moderate and markedly reduced neutralization titers,  
115 respectively, against S: E484K and S: B.1.351. Analyses of dose response curves  
116 indicate that S: B.1.351 exhibits resistance to neutralizing sera in a manner that is  
117 qualitatively different from the E484K mutant. Taken together, our data argue that  
118 surveillance of the neutralizing activity elicited by vaccine sera will be necessary on an  
119 ongoing basis. Viral neutralization assays can indicate which SARS-CoV-2 variants are  
120 likely capable of transmission in the face of vaccine elicited immunity, and whether  
121 updated vaccines will be needed to control their emergence and spread.

122

123 **RESULTS.**

124 **Robust reverse genetics for generating replication-competent VSV expressing**  
125 **SARS-CoV-2 Spike proteins.**

126 Several groups have now generated replication-competent VSV expressing SARS-  
127 CoV-2 spike in place of VSV-G (rcVSV-CoV2-S)<sup>35–37,38</sup>. These rcVSV-CoV2-S can be  
128 used in BSL-2 compatible virus neutralization assays (VNAs), which correlate very well  
129 with VNAs using live SARS-CoV-2 (Spearman's  $r > 0.9$  across multiple studies). rcVSV-  
130 CoV2-S has been assessed as a candidate vaccine<sup>37,39</sup>, and used in forward genetics  
131 experiments to generate antibody escape mutants or perform comprehensive epitope  
132 mapping studies<sup>40,20,38</sup>. Indeed, the now concerning E484K mutation, present in many  
133 variants of concern (VOC), was identified as an antibody escape mutation using rcVSV-  
134 CoV-2-S<sup>20,38</sup>.

135 However, many groups passage their rcVSV-CoV-2-S extensively in Vero cells after the  
136 initial rescue, either to generate higher titer stocks and/or to remove confounding  
137 components such as the vaccinia virus expressing T7-polymerase and/or transfected  
138 VSV-G, both of which were deemed necessary for efficient rescue<sup>38</sup>. Serial passage of  
139 rcVSV-CoV-2-S in Vero cells invariably leads to mutations in the S1/S2 furin cleavage  
140 site, as well as truncations in the cytoplasmic tail of the S protein<sup>39</sup>. The latter  
141 promotes S incorporation into VSV without compromising the conformational integrity  
142 of the ectodomain, whereas the former is problematic when assessing the  
143 neutralization sensitivity and structure-function phenotype of Spike VOC with multiple  
144 mutations that likely have complex epistatic interactions.

145 To generate rcVSV-CoV2-S containing different variants or mutants on demand,  
146 without the need for extensive passaging, we developed a robust reverse genetics  
147 system and VNA which leverages the cell lines we previously developed for a  
148 standardized SARS-CoV-2 VNA that correlates well with live virus neutralization<sup>41</sup>.  
149 Salient improvements include the addition of a hammerhead ribozyme immediately  
150 upstream of the 3' leader sequence which cleaves *in cis* to give the exact 3' termini,  
151 the use of a codon-optimized T7-polymerase which alleviates the use of vaccinia-  
152 driven T7-polymerase, and a highly permissive and transfectable 293T-  
153 ACE2+TMPRSS2 clone (F8-2)<sup>41</sup> (Extended Data Fig S1). A 6-plasmid transfection into  
154 F8-2 cells results in GFP+ cells 2-3 days post-transfection (dpt), which turn into foci of  
155 syncytia by 4-5 dpt indicating virus replication and cell-to-cell spread (Fig. 1A). Transfer  
156 of F8-2 cell supernatant into interferon-defective Vero-TMPRSS2 cells allowed for rapid  
157 expansion of low-passage viral stocks that maintain only the engineered Spike  
158 mutations. Clarified viral supernatants from Vero-TMPRSS2 cells were aliquoted,  
159 sequenced verified, then titered on F8-2 cells to determine the linear range of response  
160 (Fig. 1B).

161 Next, we generated isogenic rcVSV-CoV2-S expressing the B.1.1.7, B.1.351 (Fig. 2A),  
162 or E484K S to evaluate the neutralizing activity of Sputnik V vaccine sera from  
163 Argentina. The relevant Spike substitutions that make up these variants are indicated in  
164 Fig. 2A. The characteristics of the vaccine recipient cohort (n=12) receiving the two-  
165 dose regimen of the Sputnik vaccine are given in Table 1. At one month post-  
166 completion of the two-dose regimen, the Sputnik V vaccine generated respectable  
167 virus neutralizing titers (VNT) against rcVSV-CoV2-S bearing the WT (D614G) and  
168 B.1.1.7 spike proteins (Fig. 2B). The geometric mean titer (GMT) and 95% CI for WT  
169 (1/IC<sub>50</sub> GMT 49.4, 23.4 - 105) in our cohort of vaccine recipients was remarkably similar  
170 to that reported in the phase III Sputnik vaccine trial (GMT 44.5, 31.8 - 62.2)<sup>48,49</sup>.  
171 However, GMT against B.1.351 and E484K was reduced by a median 6.8- and 2.8-fold,  
172 respectively compared to WT (Fig. 2C).

173 Sputnik vaccine recipients appeared to generate qualitatively different neutralizing  
174 antibody responses against SARS-CoV-2 that could be segregated into three different  
175 groups (Fig. 3). Group (A) sera showed reasonable VNT against wild-type (WT) and  
176 B.1.1.7 (Fig. 3A and E). However, the Hill slope of their neutralization curves for B.1.351  
177 were extremely shallow (h<0.40), resulting in a low IC<sub>50</sub>s and maximal neutralization of  
178 50-60% even when extrapolated to full serum strength (Fig. 3E and Fig. 4). In contrast,  
179 Group (B) sera neutralized E484K and B.351 with similar potencies to WT and B.1.1.7,  
180 especially at high serum concentrations (Fig. 3B and E). This group of sera reveals that  
181 qualitatively different neutralizing responses can be generated that effectively neutralize  
182 B.1.351. Group (C) sera generally exhibited effective neutralization of WT, B.1.1.7, and  
183 even E484K at high serum concentrations, but not B.1.351 (Fig. 3C and E). The  
184 decreased potency and shallow Hill Slope result in <90% neutralization of B.1.351 even  
185 at full serum strength (see next section). One serum sample (SP012) exhibited little to  
186 no neutralizing activity against WT, E484K and B.1.351, yet it neutralized B.1.1.7 as  
187 well as Group A-C sera (Fig. 3D-E). That these three groups exhibit qualitatively  
188 distinct neutralization patterns is further highlighted by the Hill slopes of their  
189 neutralization curves (Fig. 3F). Group A sera not only have the lowest slopes against  
190 B.1.351, but as a group, they have slopes significantly <1 against the other viruses  
191 (median/IQR = 0.4965 / 0.2880 – 1.186). Group B sera mostly have slope values  
192 around 1 (median/IQR = 0.8855 / 0.7865 – 1.065) while Group C sera have the highest  
193 overall slopes (median/IQR = 1.348 / 0.8395 – 1.820) that are significantly >1 (Fig. 3F).

194 The Hill Slope of the neutralization curves against B.1.351 was significantly different  
195 from WT, B.1.1.7 and E484K (Fig. 4A). As a consequence, the maximal neutralization  
196 attainable when extrapolated to full serum strength was also significantly lower for  
197 B.1.351 compared to the rest (Fig. 4B). Conversely, the steep Hill slope for the E484K  
198 curves resulted in maximal neutralization potencies that were not significantly different  
199 from WT or B.1.1.7 despite significantly lower reciprocal IC<sub>50</sub> values (compare Fig. 2B

200 with Fig. 4B). Notably, the maximal percent inhibition was strongly correlated with the  
201 Hill Slope for WT and VOC/mutant spikes across all valid pairs of sample values (Fig.  
202 4C, n=45 pairs), suggesting that antibody co-operativity likely plays a role at high serum  
203 concentrations (see Discussion)<sup>42</sup>. While we acknowledge the limitations of  
204 extrapolating values from nonlinear regression curves, the striking correlation between  
205 slope and maximal percent inhibition attainable at full serum strength supports the  
206 robustness of our nonlinear regression model.

207 The heterogenous dose-response curves described in Fig. 3-4 is a property of Sputnik  
208 V vaccine elicited responses as soluble RBD-Fc inhibition of WT and VOC S-mediated  
209 entry produced classical dose response curves with Hill slopes close to -1.0 (Fig. 5).  
210 Both B.1.1.7 and B.1.351 were modestly but significantly more resistant to RBD-Fc  
211 inhibition (Fig. 5A-B). This is not surprising as both harbor the N501Y mutation known to  
212 enhance affinity of RBD for ACE2<sup>43-45</sup>. However, this 1.5 to 2-fold increase in RBD-Fc  
213 IC<sub>50</sub> for B.1.1.7 and B.1.351, respectively, does not explain the neutralization-resistant  
214 versus sensitive phenotype of B.1.351 versus B.1.1.7 in our virus neutralization assays.  
215 Furthermore, the E484K mutant was more sensitive to RBD-Fc inhibition than B.1.1.7  
216 (Fig. 5C-D), and yet also remained more neutralization-resistant relative to B.1.1.7.  
217 Experimental measurements of both RBD and trimeric spike binding to ACE2 have  
218 revealed that the E484K mutation alone does not confer increase binding affinity for  
219 ACE2 unlike N501Y<sup>44,46</sup>. Our RBD-Fc inhibition studies in the context of virus infection  
220 confirm and extend these results. Our data reinforces the notion that the mechanism  
221 underlying the increased neutralization resistance of E484K containing variants and  
222 mutants do not involve ACE2 binding affinity per se, but rather affects a key  
223 immunodominant epitope targeted by a significant class of human neutralizing  
224 antibodies, variably termed as RBM class II, RBS-B, or Cluster 2 antibodies<sup>47-50</sup>.  
225  
226

## 227 DISCUSSION

228 A key public health concern related to emergent SARS-CoV-2 variants is that by  
229 incrementally accruing mutations that escape neutralizing antibodies, they will  
230 penetrate herd immunity and spread to reach unvaccinated individuals, some of whom  
231 will be susceptible to severe or fatal disease.

232 Three of the six COVID-19 vaccines currently in use worldwide, namely Moderna  
233 mRNA-1273, BioNTech BNT162b2, and Janssen Ad26.COV2.S, each express S  
234 harboring K986P and V987P substitutions (2P) within a loop abutting the central helix  
235 of the S2' membrane fusion machinery<sup>51-53</sup>. This modification locks the spike in a  
236 prefusion conformation and elicits higher titers of neutralizing antibodies<sup>54,55</sup>. The  
237 Janssen vaccine has an additional deletion in the furin cleavage site, while the yet-to-  
238 be approved Novavax vaccine contains arrays of stabilized spikes conjugated onto a  
239 nanoparticle (Table 2). Of the three vaccines that do not appear to make use of 2P  
240 Spike mutants, Gamaleya's Sputnik V and AstraZeneca's AZD1222 are adenovirus-  
241 vectored vaccines encoding native S. The third is CoronaVac, a preparation of  
242 inactivated SARS-CoV-2 virions. Although all six vaccines are highly efficacious at  
243 preventing severe COVID-19 outcomes, they do not all uniformly prevent infection.  
244 Moreover, in all cases thus far examined, these first generation vaccines are less  
245 effective against variants with certain non-synonymous substitutions in Spike, such as  
246 E484K.

247 The most concerning variants are those with multiple mutations in the receptor binding  
248 domain (RBD) that confer both enhanced affinity for the hACE2 receptor and escape  
249 from neutralizing antibody responses<sup>17,24,27,33,56,57</sup>. B.1.351 and P.1 have in common  
250 three RBD substitutions (K417N/T, E484K and N501Y) whereas B.1.351, P.1 and  
251 B.1.1.7 contain the N501Y substitution. Although B.1.1.7 shows enhanced  
252 transmissibility and more severe disease outcomes<sup>52</sup>, it does not appear to be  
253 consistently more resistant to serum neutralizing responses elicited by vaccines or  
254 natural infection<sup>58,59</sup>. The same is not true, however, for the B.1.351 variant.

255 In live virus plaque reduction neutralization assays, sera from AstraZeneca vaccine  
256 recipients in South Africa exhibited 4.1 to 32.5-fold reduction in neutralizing activity  
257 against B.1.351<sup>33</sup>. The actual reduction is even more marked because 7 of 12 vaccine  
258 recipients who had neutralizing activity against the parental B.1.1 variant, had  
259 undetectable neutralization against the B.1.351 strain. Comparator sera from recipients  
260 of Moderna and BioNTech mRNA vaccines showed smaller, 6.5 to 8.6-fold reductions  
261 in neutralization<sup>60</sup>.

262 As of this writing, there are no peer-reviewed data on the protective efficacy of Sputnik  
263 V and CoronaVac against SARS-CoV-2 S variants. Here, we showed that sera from  
264 Sputnik vaccine recipients in Argentina had a median 6.1-fold and 2.8-fold reduction in  
265 GMT against B.1.351 and the E484K mutant spike, respectively. Even more revealing is



266 their dose-response curves. When extrapolated to full serum strength, half of the sera  
267 samples failed to achieve an  $IC_{80}$  and only 1 out 12 achieved an  $IC_{90}$  against B.1.351  
268 (Fig. 4A). Table 2 summarizes peer-reviewed studies that have tested post-vaccination  
269 sera from the major vaccines against the VOC/mutant spikes used in this study. Our  
270 study shows a similar mean reduction in GMT (reciprocal  $IC_{50}$ ) against E484K and  
271 B.1.351 using 1-month post-Sputnik vaccine sera when compared to other vaccines.  
272 Our sample number is admittedly small but matches the median and modal number  
273 used in other studies to date. Nonetheless, we caution that comparing only the mean  
274 reduction in  $IC_{50}$  can be misleading as an aggregate measure of serum neutralizing  
275 activity. The neutralization curves for B.1.351 in our study are not classically sigmoidal  
276 and have significantly shallower slopes than WT, B.1.17 and E484K, which result in  $\leq$   
277 90% neutralization for all but one sample when extrapolated to full serum strength. The  
278 possible mechanisms for the varying slope values are discussed below.

279 E484K is present not only as part of an ensemble of RBD mutations present in B.1.351  
280 and P.1, but in many of the 17 lineages detected from South America that carry it, such  
281 as P.2, E484K is the only RBD substitution (Supplementary Table 1). A more detailed  
282 report covering the genomic surveillance efforts in Argentina that detected the VOC  
283 which spurred our study is currently in preparation (Dr. Claudia Perandones, personal  
284 communication).

285 While the E484K substitution appears to be a common route of escape from many  
286 RBD-targeting monoclonal antibodies, it is somewhat surprising that a single mutation  
287 can confer a significant degree of neutralization resistance from polyclonal responses.  
288 Nonetheless, our data show that resistance conferred by E484K mutation be overcome  
289 by higher titer antibodies present in undiluted patient sera. But the neutralization  
290 resistance conferred by the suite of mutations present in B.1.351 appears qualitatively  
291 different. In the majority of cases, the slope of the dose response curve indicates a  
292 failure to neutralize even at full strength. We had previously shown that the dose-  
293 response curve slope is a major predictor of therapeutic potency for HIV broadly  
294 neutralizing antibodies at clinically relevant concentrations<sup>42</sup>. Importantly, the slope  
295 parameter is independent of  $IC_{50}$  but is specifically related to an antibody's epitope  
296 class. Here, we show that defining the neutralization phenotype of a given spike variant  
297 or mutant by both its relative  $IC_{50}$  and slope provides a fuller characterization of serum  
298 neutralizing activity against SARS-CoV-2 and emergent VOC.

299 The deletion of residue 242-244 in the NTD of the B.1.351 spike appear to cause large-  
300 scale resurfacing of the NTD antigenic surface resulting in greater conformational  
301 heterogeneity<sup>44</sup>. Variable neutralization responses across such a heterogenous virus  
302 population may result in the shallow slopes ( $<1$ ) seen. Furthermore, three major classes  
303 of neutralizing antibodies (RBS-A, -B, and -C) identified from convalescent patients are  
304 sensitive to either the K417N (RBS-A) or E484K (RBS-B and -C) substitutions present

305 in B.1.351. On the other hand, at high serum concentrations, co-operative effects from  
306 low-affinity spike binding antibodies or increased spike occupancy by different classes  
307 of antibodies can result in the steep Hill slope observed. The steep Hill slopes (>1.0)  
308 observed for E484K suggest such co-operative effects might be occurring.

309

310 The emergence of variants is fluid situation. B.1.427/1.429, B.1.526, and B.1.617 are  
311 other emergent VOI/VOC that could be tested. These strains have substitutions in the  
312 RBD (L452R and E484K/Q) and elsewhere in the spike that might confer some degree  
313 of neutralization resistance in our *in vitro* assays. However, all vaccines are effective  
314 against most variants, and we do not know what degree of resistance in *in vitro* assays  
315 translate to a decrease in the real world efficacy of any given vaccine.

316

317 Although we stress that the Gameyla Sputnik V vaccine is likely to retain strong  
318 efficacy at preventing severe COVID-19, even in the case of infection by VOC, our data  
319 reveal a concerning potential of B.1.351, and to a lesser extent, any variant carrying the  
320 E484K substitution (e.g. P.2), to escape the neutralizing antibody responses that this  
321 immunization elicits. Furthermore, we acknowledge that *in vivo* protective efficacy can  
322 be derived from Fc effector functions of antibodies that bind but do not neutralize. In  
323 addition, an adenoviral vectored vaccine should induce potent cell-mediated immunity  
324 against multiple epitopes, which were not measured in our study. Nevertheless, given  
325 the crucial roles neutralizing antibodies play in preventing infection, our results suggest  
326 that updated SARS-CoV-2 vaccines will be necessary to eliminate the virus.

327

## 328 **Materials and Methods**

329

### 330 **Cell lines**

331 Vero-CCL81 TMPRSS2, HEK 293T-hACE2 (clone 5-7), and 293T-hACE2-TMPRSS2  
332 (clone F8-2) cells were described previously<sup>41</sup>, and were maintained in DMEM +  
333 10%FBS. The HEK 293T-hACE2-TMPRSS2 cells were plated on collagen coated  
334 plates or dishes. BSR-T7 cells<sup>61</sup>, which stably express T7-polymerase were maintained  
335 in DMEM with 10% FBS.

### 336 **VSV-eGFP-CoV2 spike ( $\Delta$ 21aa) genomic clone and helper plasmids.**

337 We cloned VSV-eGFP sequence into pEMC vector (pEMC-VSV-eGFP), which includes  
338 an optimized T7 promoter and hammerhead ribozyme just before the 5' end of the viral

339 genome. The original VSV-eGFP sequence was from pVSV-eGFP, a generous gift of  
340 Dr. John Rose<sup>62</sup>.

341 We generated pEMC-VSV-eGFP-CoV2-S (Genbank Accession: MW816496) as follows:  
342 the VSV-G open reading frame of pEMC-VSV-eGFP was replaced with the SARS-CoV-  
343 2 S, truncated to lack the final 21 amino acids<sup>63</sup>. We introduced a Pac-I restriction  
344 enzyme site just after the open reading frame of S transcriptional unit, such that the S  
345 transcriptional unit is flanked by MluI / PacI sites. SARS-CoV-2 S is from pCAGGS-  
346 CoV-2-S<sup>64</sup>, which codes the codon optimized S from the Wuhan Hu-1 isolate (NCBI  
347 ref. seq. NC\_045512.2) with a point mutation of D614G, resulting in B.1 lineage. The  
348 B.1.1.7 Spike we used carries the mutations found in GISAID Accession Number  
349 EPI\_ISL\_668152: del 69-70, del145, N501Y, A570D, D614G, P681H, T716I, S982A, and  
350 D1118H. The B.1.351 Spike carries the mutations D80A, D215G, del242-244, K417N,  
351 E484K, N501Y, D614G, and A701V (from EPI\_ISL\_745109). The Spike sequences of  
352 WT, B.1.1.7, B.1.351, and E484K are available at Genbank (Accession Numbers:  
353 MW816497, MW816498, MW816499, and MW816500; please also see Supplemental  
354 Table 2).

355 Sequences encoding the VSV N, P, M, G, and L proteins were also cloned into pCI  
356 vector to make expression plasmids for virus rescue, resulting in plasmids: pCI-VSV-N,  
357 pCI-VSV-P, pCI-VSV-M, pCI-VSV-G, and pCI-VSV-L. These accessory plasmids were  
358 a kind gift from Dr. Benjamin tenOever.

### 359 **Generation of VSV-CoV2 spike from cDNA**

360  $4 \times 10^5$  293T-ACE2-TMPRSS2 cells per well were seeded onto collagen-I coated 6 well  
361 plates. The next day, 2000 ng of pEMC-VSV-EGFP-CoV2 spike, 2500 ng of pCAGGS-  
362 T7opt<sup>65</sup>, 850 ng of pCI-VSV-N, 400 ng of pCI-VSV-P, 100 ng of pCI-VSV-M, 100 ng of  
363 pCI-VSV-G, 100 ng of pCI-VSV-L were mixed with 4 mL of Plus reagent and 6.6 mL of  
364 Lipofectamine LTX (Invitrogen). 30 min later, transfection mixture was applied to 293T-  
365 hACE2-TMPRSS2 cells in a dropwise fashion. Cells were maintained with medium  
366 replacement every day for 4 to 5 days until GFP positive syncytia appeared. Rescued  
367 viruses were amplified in Vero-CCL81 TMPRSS2 cells<sup>41</sup>, then titered and used for the  
368 assay.

369

### 370 **Virus neutralization assay**

371  $5 \times 10^4$  293T-hACE2-TMPRSS2 cells per well were seeded onto collagen-coated 96  
372 well cluster plates one day prior to use in viral neutralization assays. Virus stocks were  
373 mixed with serially diluted serum for 10 minutes at room temperature, then infected to  
374 cells. Note: all sera assayed in this study were previously heat inactivated by 56  
375 degrees for 30 min before use in any viral neutralization studies. At 10 h post infection,  
376 GFP counts were counted by Celigo imaging cytometer (Nexcelom). Each assay was

377 done in triplicate. For calculation of IC<sub>50</sub>, GFP counts from “no serum” conditions were  
378 set to 100%; GFP counts of each condition (serum treated) were normalized to no  
379 serum control well. Inhibition curves were generated using Prism 8.4.3 (GraphPad  
380 Software) with ‘log (inhibitor) vs normalized response - variable slope’ settings.

381

### 382 **Design of RBD-Fc producing Sendai virus**

383 Sendai virus (SeV) Z strain cDNA sequence (AB855655.1) was generated and cloned  
384 into pRS vector with the addition of eGFP transcriptional unit at the head of SeV  
385 genome. The sequence of F transcriptional unit was from SeV fushimi strain  
386 (KY295909.1) due to the cloning reason. We refer to the pRS-based plasmid coding  
387 this sequence as pRS-SeVZ-GFP-F<sup>fushimi</sup> in this paper. For the introduction of foreign  
388 gene into SeV, we generated additional transcriptional unit for RBD-Fc between P gene  
389 and M gene. RBD-Fc construct was generated as below; codon optimized DNA  
390 sequence of from SARS-CoV-2 spike (MN908947) in pCAGGS a gift of Dr. Florian  
391 Krammer<sup>64</sup>. S amino acids 319 – 541 (corresponding to the RBD domain) sequence  
392 were C-terminally fused to the Fc region of human IgG<sub>1</sub> (220 – 449 aa of P0DOX5.2)

393

### 394 **Generation of recombinant Sendai virus from cDNA.**

395 2x10<sup>5</sup> BSR-T7 cells per well were seeded onto 6-well cluster plates. The next day, 4  
396 µg of pRS-SeVZ-GFP-F<sup>fushimi</sup>, 4 µg of pCAGGS-T7opt, 1.44 µg of SeV-N, 0.77 µg of  
397 SeV-P, 0.07 µg of SeV-L were mixed with 5.5 µl of Plus reagent and 8.9 µl of  
398 Lipofectamine LTX (Invitrogen). 30 min later, transfection mixtures were applied to Bsr-  
399 T7 cells in a dropwise fashion, as described previously<sup>65</sup>. At one day post transfection,  
400 medium was replaced with DMEM + 0.2 µg/ml of TPCK-trypsin (Millipore Sigma,  
401 #T1426), with subsequent medium replacement each day until infection reached 100%  
402 cytopathic effect. Supernatants were stored at -80°C until use in experiments.

403

### 404 **Titration of viruses.**

405 For SeV titration, 2 x 10<sup>4</sup> Bsr-T7 cells per well were seeded onto 96-well plates. The  
406 next day, 100 µL of serially diluted virus stock (in DMEM + 10% FBS) were applied to  
407 each well. GFP positive foci were counted at 24 hours post infection using a Celigo  
408 imaging cytometer (Nexcelom, Inc.). Infectivity is presented in infectious units (IU) per  
409 mL.

410 For VSV-CoV2 titration, 5 x 10<sup>4</sup> 293T-hACE2-TMPRSS2 cells per well were seeded  
411 onto a collagen-coated 96 well plate. Serially diluted virus stocks were then applied to

412 the cells, and GFP positivity was scored at 10 h post infection using a Celigo imaging  
413 cytometer.

414

#### 415 **Production of proteins and purification.**

416 5×10E6 Bsr-T7 cells are seeded in T175cm<sup>2</sup>-flask one day before infection. Cells were  
417 infected by SeV at MOI of 0.1 for one hour, followed by replacement of medium with  
418 DMEM supplemented with 0.2 mg/mL TPCK-trypsin. Medium was replaced with fresh  
419 0.2 mg/ml TPCK-trypsin containing DMEM each day until infection reached 100%  
420 CPE, at which point medium was exchanged for DMEM lacking TPCK-trypsin. Cells  
421 were incubated for additional 24 h to allow protein production. Supernatants were  
422 centrifuged at 360 g for 5 min, then filtered with 0.1 µm filter (Corning® 500 mL Vacuum  
423 Filter/Storage Bottle System, 0.1 µm Pore) to remove virions and debris. Supernatant  
424 including RBD-Fc were applied to Protein G Sepharose (Millipore Sigma, #GE17-0618-  
425 01) containing column (5ml Polypropylene Columns ;ThermoFisher, #29922), followed  
426 by wash and elution.

427

#### 428 **Human Subjects Research.**

429 Human subjects research was conducted following the Declaration of Helsinki and  
430 related institutional and local regulations. Studies and serum collection relating to the  
431 Sputnik vaccine at ANLIS Dr. Carlos G. Malbrán (National Administration Laboratories  
432 and Health Institutes - Carlos G. Malbrán, Argentina) were approved by the Research  
433 Ethics Committee of its Unidad Operativa Centro de Contención Biológica (UOCCB) on  
434 9 Feb 2021.

#### 435 **Authors contributions**

436 S.I., C.P., B.H.L., J.P.K, conceived of and supervised the study. C.P., A.E.V. and A.E.  
437 supervised, collected, analyzed, and provided materials relevant to this study. S.I.  
438 generated VSV-CoV-2 S plasmid and rescued viruses. S.I., G.H., S.K., and M.N.A.S.  
439 were involved in the generation of S mutant viruses. S.I, L.B., M.N.A.S., K.Y.O.  
440 conducted neutralization assays. S.I. and C.T.H. developed the Sendai virus protein  
441 expressing system and purified RBD-Fc protein. S.I., B.H.L., and J.P.K. wrote the  
442 paper with input from C.P. and all co-authors.

443

#### 444 **Acknowledgements**

445 We gratefully acknowledge all submitting authors and collecting authors on whose  
446 work this research is based, and to all researchers, clinicians, and public health

447 authorities who make SARS-CoV-2 sequence data available in a timely manner via the  
448 GISAID initiative<sup>66,67</sup>.

449

#### 450 **Funding information**

451 We acknowledge the following finding. K.Y.O. was supported by Viral-Host  
452 Pathogenesis Training Grant T32 AI07647 and additionally by a NRSA F31 AI154739.  
453 S.I. and C.-T.H. were supported by postdoctoral fellowships from CHOT-SG (Fukuoka  
454 University, Japan) and the Ministry of Science and Technology (MOST, Taiwan),  
455 respectively. B.L. acknowledges flexible funding support from NIH grants AI123449  
456 and AI138921; a grant from the Department of Microbiology, Icahn School of Medicine  
457 at Mount Sinai; and the Ward-Coleman estate, which endowed the Ward-Coleman  
458 Chairs at the ISMMS. J.P.K. was supported by a COVID-19 Fast Grants award from  
459 Emergent Ventures, an initiative of the Mercatus Center at George Mason University,  
460 and by an intramural grant and other funding from the Office of the Vice Chancellor for  
461 Research at LSU Health Sciences Center Shreveport (J.P.K., M.N.A.S.). Processing  
462 costs recovered from multiple users of our standardized SARS-CoV-2 VSV  
463 pseudotyped particles provided additional support (BL). Work at ANLIS-MALBRAN  
464 (A.E.V., A.E., C.P.) was supported by the Ministry of Health (Ministerio de Salud),  
465 Argentina.

466 **Table 1. Cohort characteristics of Sputnik vaccine recipients from ANLIS MALBRÁN**  
 467 **(Buenos Aires, República Argentina).**

468

| Sera ID | 1 <sup>st</sup> DOSE | 2 <sup>nd</sup> DOSE | Vaccine Status | SEX               | AGE          |
|---------|----------------------|----------------------|----------------|-------------------|--------------|
| SP001   | Late Dec/2020        | Mid Jan/2021         | (+)            | M                 | 45-50        |
| SP002   | Late Dec/2020        | Mid Jan/2021         | (+)            | M                 | 40-45        |
| SP003   | Late Dec/2020        | Mid Jan/2021         | (+)            | M                 | 55-60        |
| SP004   | Late Dec/2020        | Mid Jan/2021         | (+)            | M                 | 50-55        |
| SP005   | Late Dec/2020        | Mid Jan/2021         | (+)            | M                 | 35-40        |
| SP006   | Late Dec/2020        | Mid Jan/2021         | (+)            | F                 | 35-40        |
| SP007   | Late Dec/2020        | Mid Jan/2021         | (+)            | F                 | 20-25        |
| SP008   | Late Dec/2020        | Early Feb/2021       | (+)            | M                 | 35-40        |
| SP009   | Late Dec/2020        | Early Feb/2021       | (+)            | F                 | 30-35        |
| SP010   | Late Dec/2020        | Mid Jan/2021         | (+)            | M                 | 30-35        |
| SP011   | Late Dec/2020        | Mid Jan/2021         | (+)            | M                 | 40-45        |
| SP012   | Late Dec/2020        | Mid Jan/2021         | (+)            | M                 | 25-30        |
|         |                      |                      |                | <b>Median Age</b> | <b>39.5</b>  |
|         |                      |                      |                | <b>Range</b>      | <b>25-56</b> |
| SP013   | N.A.                 | N.A.                 | (-)            | F                 | 45-50        |
| SP014   | N.A.                 | N.A.                 | (-)            | F                 | 50-55        |
| SP015   | N.A.                 | N.A.                 | (-)            | M                 | 40-45        |

469 **N.A., Not Applicable**

**Table 2.** Summary of post-vaccine sera evaluated for neutralization potency against the indicated SARS-CoV-2 variants of concern (VOC). Table format adapted and updated from Abdool Karim and de Oliveira<sup>60</sup>.

| Vaccine                                                                                                                                                                                                                                                   | Company         | Spike Construct | Neutralization Assay (IC <sub>50</sub> Fold-reduction vs WT) |                      |                 |                                      | Reference PMID |
|-----------------------------------------------------------------------------------------------------------------------------------------------------------------------------------------------------------------------------------------------------------|-----------------|-----------------|--------------------------------------------------------------|----------------------|-----------------|--------------------------------------|----------------|
|                                                                                                                                                                                                                                                           |                 |                 | B.1.1.7 Variant                                              | P.1 Variant<br>E484K | B.1.351 Variant | # samples tested (n)                 |                |
| Adapted from <b>Table 1</b> of SS Abdool Karim and T de Oliveira, New SARS-CoV-2 Variants – Clinical, Public Health, and Vaccine Implications. <i>NEJM</i> , 24 Mar, 2021, DOI: <a href="https://doi.org/10.1056/NEJMc2100362">10.1056/NEJMc2100362</a> . |                 |                 |                                                              |                      |                 |                                      |                |
| Ad26.COVS.S                                                                                                                                                                                                                                               | Johnson&Johnson | 2P & ΔFurin     | ≤2× (n.s.)                                                   | NA                   | ≤5×             | 8*                                   | 33909009       |
| BNT162b2                                                                                                                                                                                                                                                  | Pfizer/BioNTech | "2P"            | 2×                                                           | NA                   | ≤6.5×           | 10                                   | 33684923       |
|                                                                                                                                                                                                                                                           |                 |                 | 2× (n.s.)                                                    | 6.7×                 | 35×             | 30                                   | 33743213       |
|                                                                                                                                                                                                                                                           |                 |                 | 3.3×                                                         | NA                   | NA              | 25                                   | 33743891       |
|                                                                                                                                                                                                                                                           |                 |                 | NA                                                           | NA                   | 7.9             |                                      | 33730597       |
| mRNA-1273                                                                                                                                                                                                                                                 | Moderna         | "2P"            | 1.8×                                                         | NA                   | ≤8.6×           | 12                                   | 33684923       |
|                                                                                                                                                                                                                                                           |                 |                 | (n.s.)                                                       | 4.5×                 | 28×             | 35                                   | 33684923       |
| Pfizer/BioNTech (Pzf) OR Moderna (Mod)                                                                                                                                                                                                                    |                 | "2P"            | NA                                                           | ≤3×                  | NA              | 4 <sup>Pzf</sup> , 11 <sup>Mod</sup> | 33567448       |
| NVX-CoV2373                                                                                                                                                                                                                                               | Novavax         | Stabilized      | 2×                                                           | NA                   | NA              | 28                                   | 33705729       |
| AZD1222                                                                                                                                                                                                                                                   | AstraZeneca     | Native          | NA                                                           | NA                   | 4×              | 13                                   | 33725432       |
|                                                                                                                                                                                                                                                           |                 |                 | 8.9×                                                         | NA                   | NA              | 49                                   | 33798499       |
|                                                                                                                                                                                                                                                           |                 |                 | 2.1~2.5×                                                     | NA                   | NA              | 25                                   | 33743891       |
|                                                                                                                                                                                                                                                           |                 |                 | NA                                                           | NA                   | 9×              |                                      | 33730597       |
| CoronaVac                                                                                                                                                                                                                                                 | Sinovac         | Native          | NA                                                           | NA                   | NA              | N.D.                                 | N.D.           |
| BBIBP-CorV                                                                                                                                                                                                                                                | Sinopharm       | Native          | NA                                                           | NA                   | 1.6× (n.s.)     | 12**                                 | 33870240       |
| Current Study: Ikegame et al, Apr, 2021                                                                                                                                                                                                                   |                 |                 | B.1.1.7                                                      | E484K                | B.1.351         |                                      |                |
| Sputnik V                                                                                                                                                                                                                                                 | Gamaleya        | Native          | (n.s.)                                                       | 2.8x                 | 6.1x            | 12                                   | 33821288       |
|                                                                                                                                                                                                                                                           |                 |                 |                                                              |                      | Mean            | 19.6                                 |                |
|                                                                                                                                                                                                                                                           |                 |                 |                                                              |                      | Median          | 12.5                                 |                |
|                                                                                                                                                                                                                                                           |                 |                 |                                                              |                      | Mode            | 12.0                                 |                |

\* Non-human Primate data only

\*\* Preprint only



**SUPPLEMENTAL TABLE 1. Acknowledgement of S: E484K viruses from South America shared on GISAID.**

**SUPPLEMENTAL TABLE 2. Acknowledgement of B.1.1.7 and B.1.351 viruses used for selection of S variants evaluated in this study.**

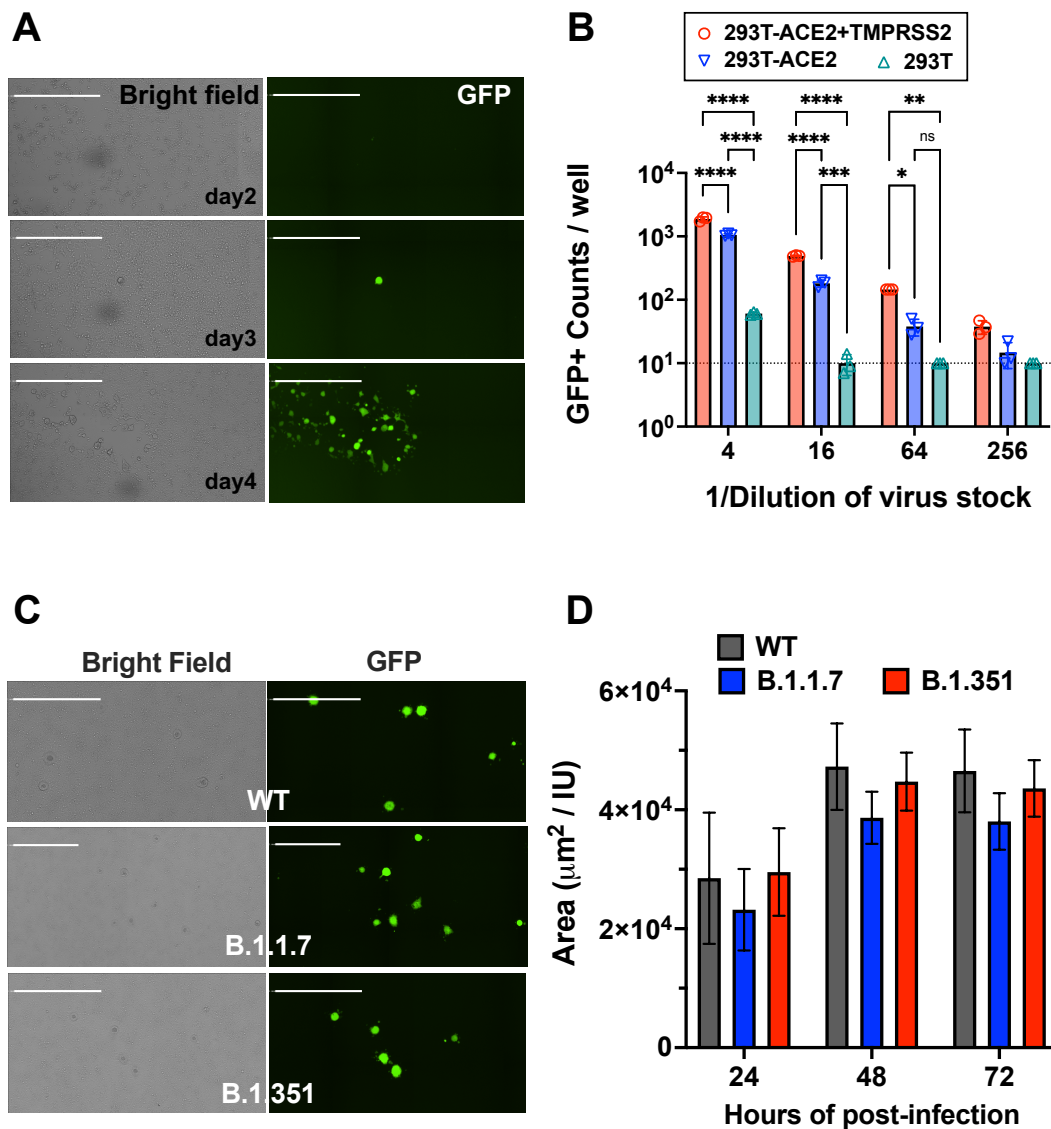

**Figure 1. Replication-competent VSV bearing wild-type and variant SARS-CoV-2 spike (rcVSV-CoV2-S).**

**(A)** Representative images of *de novo* generation of rcVSV-CoV2-S, carrying an EGFP reporter, in transfected 293T-ACE2+TMPRSS2 (F8-2) cells as described in Extended Data Fig. S1. Single GFP+ cells detected at 2-3 days post-transfection (dpt) form a foci of syncytia by 4 dpt. Images are taken by Celigo imaging cytometer (Nexcelom) and are computational composites from the identical number of fields in each well. White bar is equal to 1 millimeter. **(B)** Entry efficiency of rcVSV-CoV2-S in parental 293T cells, 293T stably expressing ACE2 alone (293T-ACE2) or with TMPRSS2 (293T-ACE2+TMPRSS2). Serial dilutions of virus stocks amplified on Vero-TMPRSS2 cells were used to infect the indicated cell lines in 96-well plates in triplicates. GFP signal was detected and counted by a Celigo imaging cytometer (Nexcelom) 10 hours post-infection. Symbols are individual data points from triplicate infections at the indicated dilutions. Bars represent the average of 3 replicates with error bars indicating standard deviation. A two-way ANOVA was used to compare the differences

between cell lines at any given dilution. Adjusted p values from Tukey's multiple comparisons test are given (ns; not significant, \*  $p < 0.05$ , \*\*  $p < 0.01$ , \*\*\*  $p < 0.001$ , \*\*\*\*  $p < 0.0001$ ). **(C)** rcVSV-CoV-2-S containing the prevailing WT (D614G) and VOC (B.1.1.7 and B.1.351) spikes were inoculated into one 6-well each of F8-2 cells (MOI 0.1) and subsequently overlaid with methylcellulose-DMEM to monitor syncytia formation. Representative images of syncytial plaques at 48 hpi are shown. White bar equals 1 millimeter. **(D)** shows the growth of GFP positive area / infectious unit (IU) in the 6 well plate. GFP positive areas were imaged and measured by the Celigo imaging cytometer. IU was checked at 10 hpi in the same well. Bar shows the average of 3 independent experiments with error bar indicating standard deviation. No statistically significant differences were detected between WT and VOC spikes in the size of GFP+ syncytia at any given time point (two-way ANOVA as above, 'ns' not indicated in graph).

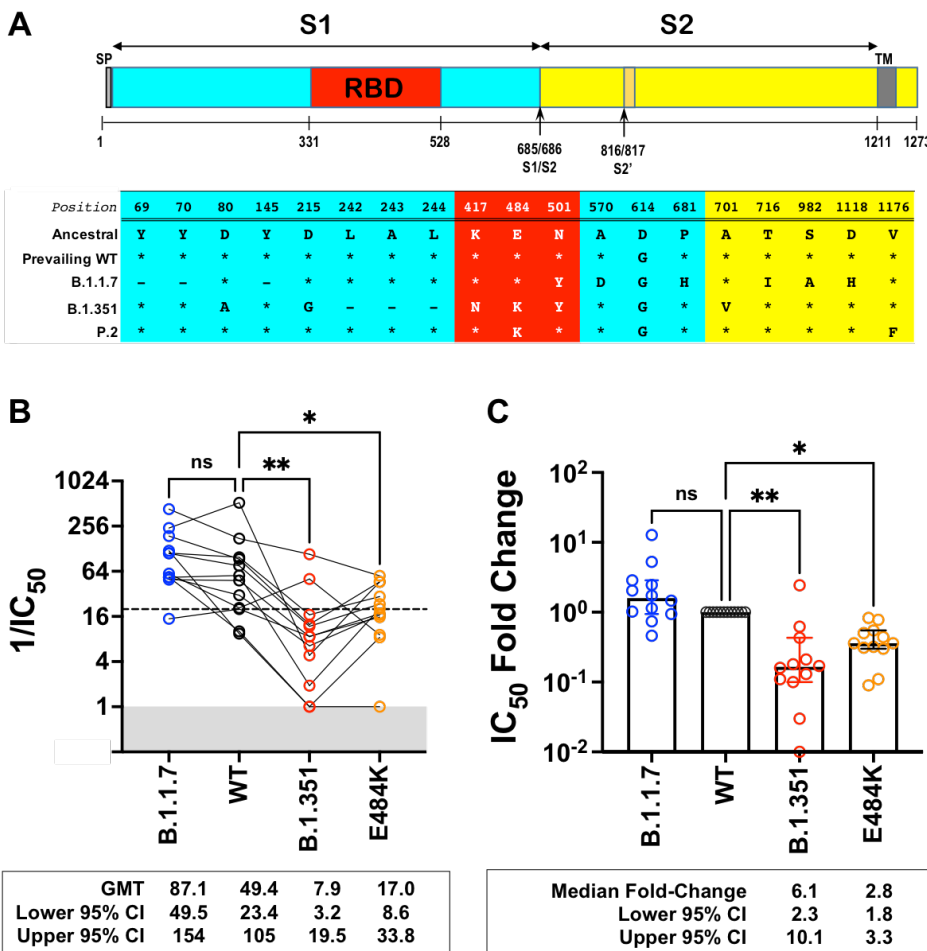

**Figure 2. Neutralization activity of antibody responses elicited by the Sputnik V vaccine.** (A) Schematic of the Spike substitutions that make up the variants being evaluated in this study. The amino acid positions and corresponding ‘Ancestral’ sequence of the Wuhan isolate is shown. The prevailing WT sequence now has a D614G substitution. All the variants and mutants have D614G. (B) Neutralization activity of individual serum samples against rcVSV-CoV2-S with the WT, variant (B.1.1.7 or B.1.351), or mutant E484K spike proteins. Neutralization is represented by the reciprocal 50% inhibitory dilution factor ( $1/IC_{50}$ ). Sera samples with no appreciable neutralization against a given virus were assigned a defined  $1/IC_{50}$  value of 1.0, as values  $\leq 1$  are not physiological (Grey shaded area). Dashed line indicates the lowest serum dilution tested ( $1/IC_{50} = 20$ ). Geometric mean titers (GMT and 95% CI) for the neutralizing activity of all vaccine sera are indicated below each of the viral spike proteins examined. NS; not significant, \*,  $p < 0.05$ ,  $p < 0.01$ ; \*\* are adjusted p values from non-parametric one-way ANOVA with Dunn’s multiple comparisons test. (C) For each serum sample, the fold-change in  $IC_{50}$  (reciprocal inhibitory dilution factor) against the indicated variant and mutant spike proteins relative to its  $IC_{50}$  against wild-type (WT) spike (set at 1) is plotted. Adjusted p values were calculated as in (B). Medians are represented by the bars and whiskers demarcate the 95% CI. Neutralization dose-response curves were performed in triplicates, and the mean values from each triplicate experiment are shown as the single data points for each sera sample.

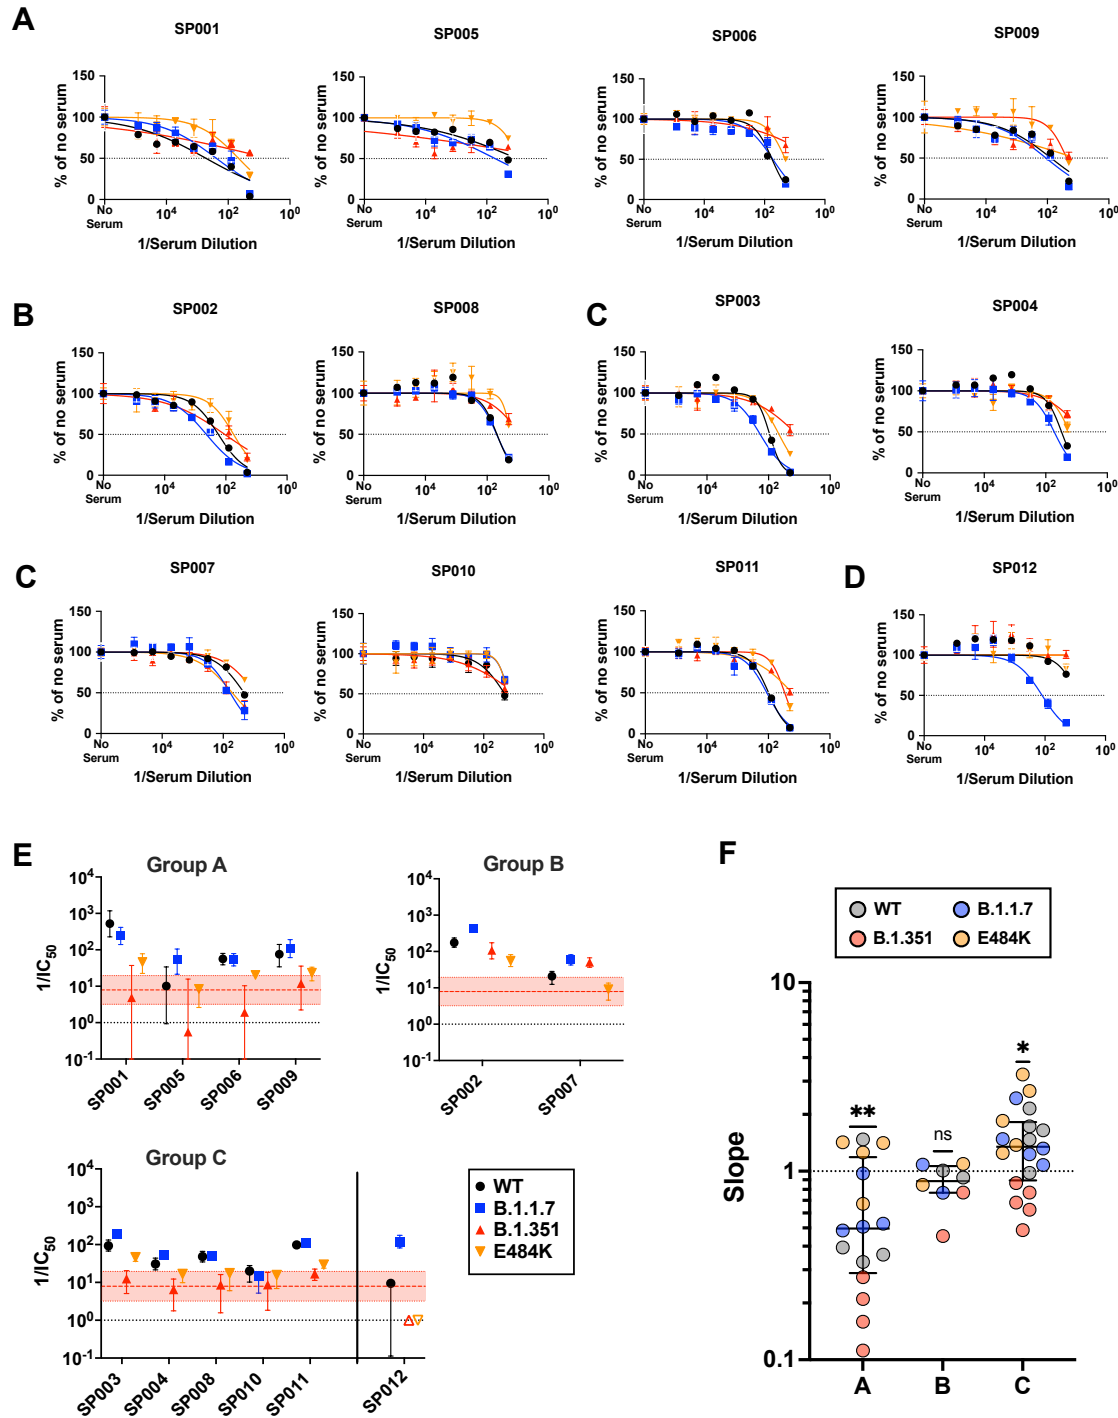

**Figure 3. Sputnik vaccine recipients generate qualitatively different neutralizing antibody responses against SARS-CoV-2. (A-C)** Group A (SP001, SP005, SP006, SP012), Group B (SP002, SP007), and Group C (SP003, SP004, SP008, SP010, SP011) represent potentially distinct classes of virus neutralizing activity present in the sera samples analyzed. Full

neutralization curves for all sera tested against all viruses bearing the variant and mutant spike proteins are shown. **(D)** shows a singular example of a serum that only neutralized the B.1.1.7 spike. **(E)** graphs the serum neutralizing titers ( $SNT = 1/IC_{50}$ ) and 95% CI that can be extrapolated from the nonlinear regression curves shown for all the sera samples analyzed. Colored filled symbols represent the indicated viruses, open symbols in (E) represent assigned SNT values of 1.0 when no significant neutralization activity could be detected (SP012, B.1.351 and E484K). The dotted black line represents a reciprocal serum dilution of 1.0. The red dashed line and shaded boundaries represent the geometric mean titer and 95% CI, respectively, for B.1.351. **(F)** The Hill slope values for all the neutralization curves are aggregated according to their groups. The different colored symbols in each group represent the indicated virus tested. P values are from a non-parametric Wilcoxon signed rank test using a theoretical median of 1.0.

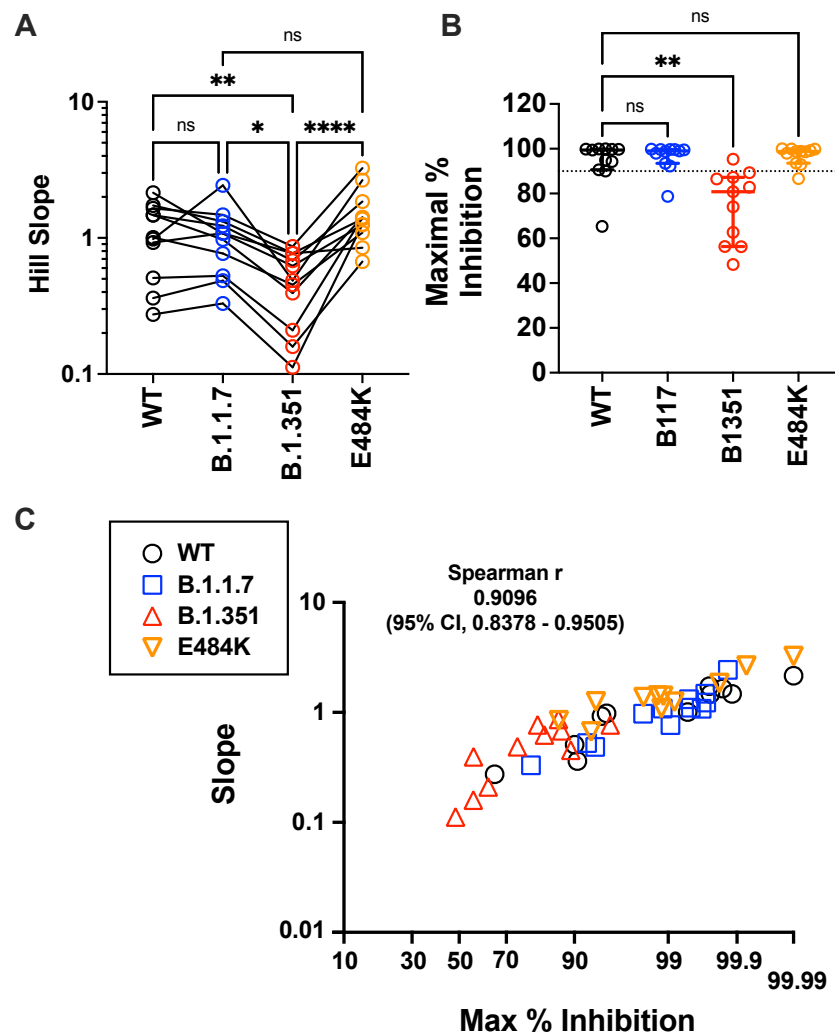

**Figure 4. Maximal inhibition and slope help to define the distinct classes of neutralizing sera in Sputnik vaccine recipients. (A)** Paired comparison of Hillslopes from the neutralization curves of all samples except for SP012 where no significant neutralization was observed for viruses other than B.1.1.7. NS; not significant,  $p < 0.05$ ; \*,  $p < 0.01$ ; \*\*,  $p < 0.0001$ ; \*\*\*\*, are adjusted  $p$  values from non-parametric one-way ANOVA with Dunn's multiple comparisons test, which assumes non-Gaussian distribution of values being analyzed. **(B)** Maximal percent inhibition (MPI) at full serum strength extrapolated from nonlinear regression of  $\log(\text{inhibitor})$  versus normalized response, variable slope curve. Model used is from PRISM v9.1 where  $Y = 100 / (1 + 10^{((\text{LogIC}_{50} - X) * \text{HillSlope}))})$ .  $\text{LogIC}_{50}$  and Hill slope values were obtained for each curve generated in Fig. 3.  $\text{MPI} = 100 - Y$ , when  $X = 0$  for reciprocal serum dilution of 1 ( $10^0 = 1$ ). Data points for one serum (SP012) against WT, B.1.351 and E484K could not be calculated because there was no best-fit value. The dotted line indicates 90% inhibition. Median (central bar) and interquartile values (whiskers) are indicated. Adjusted  $p$  values was calculated as in (A). **(C)** Correlation analysis of MPI versus the Hill Slope parameter for all sera samples tested against all spike proteins. SP012 was excluded for the abovementioned reasons. Non-parametric Spearman  $r$  values and 95% confidence interval are shown. X-axis is plotted as an asymptotic cumulative probability scale as  $x$  approaches 100% (PRISM v9.1.1) only to resolve the many MPI values  $> 90\%$ .

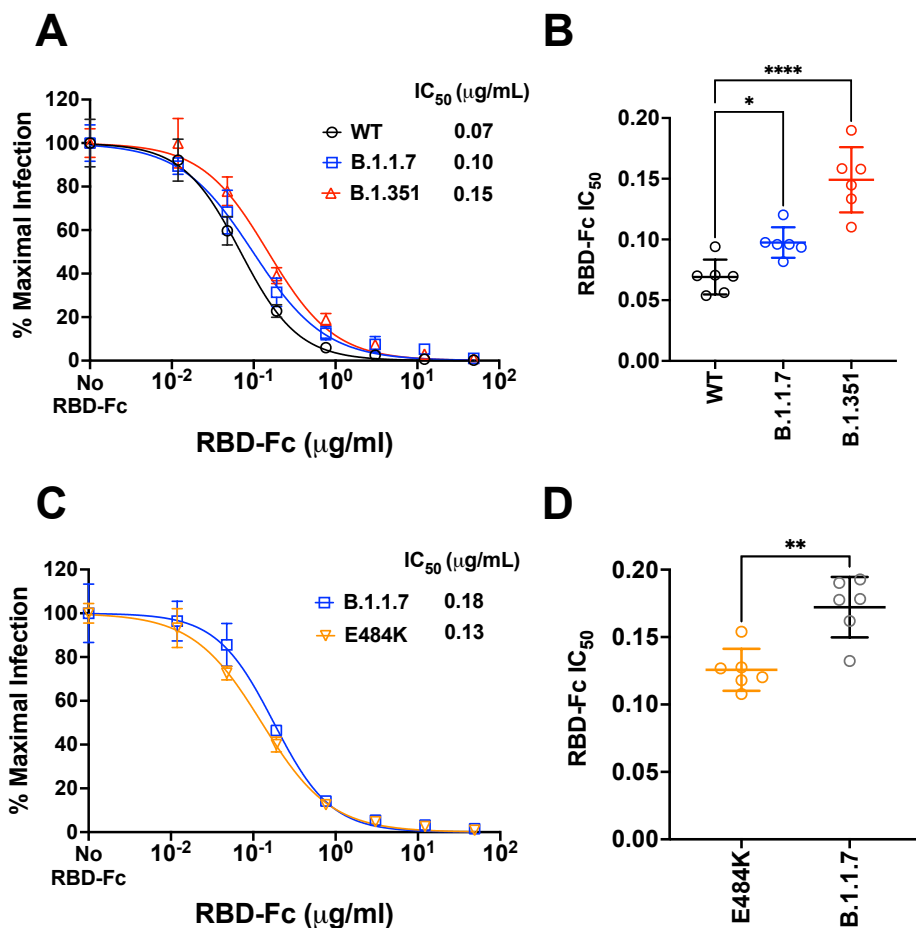

**Figure 5. Competitive inhibition of rcVSV-CoV2-S entry by soluble RBD-Fc. (A)**

Recombinant RBD-Fc was serially titrated with the infection inoculum containing a fixed amount of rcVSV-CoV2-S bearing WT or the indicated VOC spike proteins. 10 hpi, GFP+ cells were quantified by the Celigo image cytometer. Data points are means of six independent replicates with error bars representing S.D. The number of GFP+ cells in the absence of any RBD-Fc was set to 100% and used to normalize the infection response in the presence of increasing amounts of RBD-Fc. Log[inhibitor] versus normalized response variable slope nonlinear regression curves were generated using GraphPad PRISM (v9.1.0). **(B)** The IC<sub>50</sub> values from each replicate dose response curve generated for a given virus were grouped. The mean (central bar) and SD (whiskers) for each group are indicated. Adjusted p values (\*; p<0.05, \*\*; p<0.01, \*\*\*\*; p<0.0001) from ordinary one-way ANOVA with Dunnett's multiple comparisons test are indicated. **(C)** is a repeat of the experiment done in A with the E484K mutant using a different preparation of recombinant RBD-Fc (see methods). B.1.1.7 serves as the common reference control. **(D)** The IC<sub>50</sub> values were calculated and analyzed as in (B).



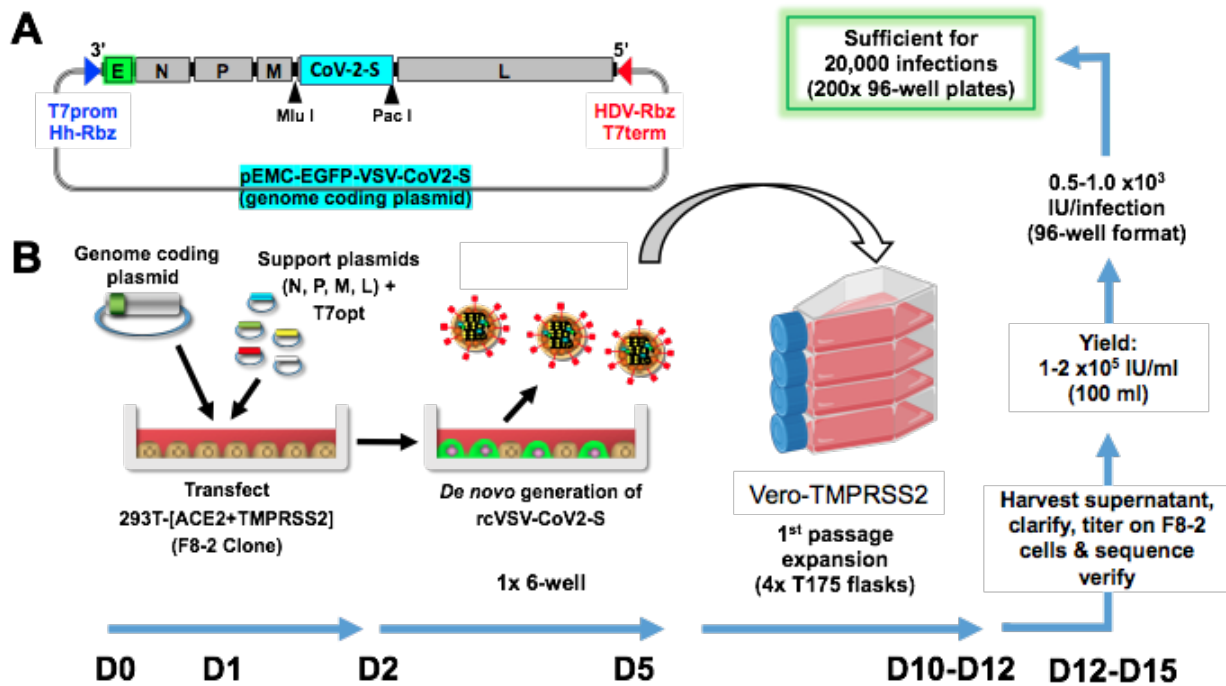

**Extended Data Figure S1. Robust and efficient generation of an EGFP-reporter replication-competent VSV bearing SARS-CoV-2 spike (rcVSV-CoV2-S).** (A) Schematic of the rcVSV-CoV2-S genomic coding construct and the virus rescue procedure. The maximal T7 promoter (T7prom) followed by a hammer-head ribozyme (HhRbz) and the HDV ribozyme (HDVRbz) plus T7 terminator (T7term) are positioned at the 3' and 5' ends of the viral cDNA, respectively. An EGFP(E) transcriptional unit is placed at the 3' terminus to allow for high level transcription. SARS-CoV-2-S is cloned in place of VSV-G using the indicated restriction sites designed to facilitate easy exchange of spike variant or mutants. (B) For virus rescue, highly permissive 293T cells stably expressing human ACE2 and TMPRSS2 (293T-[ACE2+TMPRSS2], F8-2 clone) cells were transfected with the genome coding plasmid, helper plasmids encoding CMV-driven N, P, M, and L genes, and pCAGS encoding codon-optimized T7-RNA polymerase(T7opt). 48-72 hpi, transfected cells turn EGFP+ and start forming syncytia. Supernatant containing rcVSV-CoV2-S are then amplified in Vero-TMPRSS2 cells at the scale shown. The blue arrows at the bottom indicate the timeline for production of each sequence verified stock.

## REFERENCES

1. Huang, C. *et al.* Clinical features of patients infected with 2019 novel coronavirus in Wuhan, China. *Lancet* **395**, 497–506 (2020).
2. COVID-19 Map - Johns Hopkins Coronavirus Resource Center.  
<https://coronavirus.jhu.edu/map.html>.
3. Boni, M. F. *et al.* Evolutionary origins of the SARS-CoV-2 sarbecovirus lineage responsible for the COVID-19 pandemic. *Nat Microbiol* **382**, 1199 (2020).
4. Logunov, D. Y. *et al.* Safety and efficacy of an rAd26 and rAd5 vector-based heterologous prime-boost COVID-19 vaccine: an interim analysis of a randomised controlled phase 3 trial in Russia. *Lancet* **397**, 671–681 (2021).
5. Baden, L. R. *et al.* Efficacy and safety of the mRNA-1273 SARS-CoV-2 vaccine. *N. Engl. J. Med.* **384**, 403–416 (2021).
6. Polack, F. P. *et al.* Safety and Efficacy of the BNT162b2 mRNA Covid-19 Vaccine. *N. Engl. J. Med.* **383**, 2603–2615 (2020).
7. Zhang, Y. *et al.* Safety, tolerability, and immunogenicity of an inactivated SARS-CoV-2 vaccine in healthy adults aged 18–59 years: a randomised, double-blind, placebo-controlled, phase 1/2 clinical trial. *Lancet Infect. Dis.* (2020).
8. Sadoff, J. *et al.* Interim Results of a Phase 1–2a Trial of Ad26.COV2.S Covid-19 Vaccine. *N. Engl. J. Med.* (2021) doi:10.1056/NEJMoa2034201.
9. Folegatti, P. M. *et al.* Safety and immunogenicity of the ChAdOx1 nCoV-19 vaccine against SARS-CoV-2: a preliminary report of a phase 1/2, single-blind, randomised controlled trial. *Lancet* **396**, 467–478 (2020).

10. Addetia, A. *et al.* Neutralizing Antibodies Correlate with Protection from SARS-CoV-2 in Humans during a Fishery Vessel Outbreak with a High Attack Rate. *J. Clin. Microbiol.* **58**, (2020).
11. Khoury, D. S. *et al.* What level of neutralising antibody protects from COVID-19? *bioRxiv* (2021) doi:10.1101/2021.03.09.21252641.
12. Andrew Rambaut, Nick Loman, Oliver Pybus, Wendy Barclay, Jeff Barrett, Alesandro Carabelli, Tom Connor, Tom Peacock, David L Robertson, Erik Volz, COVID-19 Genomics Consortium UK (CoG-UK). Preliminary genomic characterisation of an emergent SARS-CoV-2 lineage in the UK defined by a novel set of spike mutations. *Virological.org* <https://virological.org/t/preliminary-genomic-characterisation-of-an-emergent-sars-cov-2-lineage-in-the-uk-defined-by-a-novel-set-of-spike-mutations/563> (2020).
13. Choi, B. *et al.* Persistence and Evolution of SARS-CoV-2 in an Immunocompromised Host. *N. Engl. J. Med.* **383**, 2291–2293 (2020).
14. Davies, N. G. *et al.* Estimated transmissibility and impact of SARS-CoV-2 lineage B.1.1.7 in England. *Science* (2021) doi:10.1126/science.abg3055.
15. Davies, N. G. *et al.* Increased mortality in community-tested cases of SARS-CoV-2 lineage B.1.1.7. *Nature* (2021) doi:10.1038/s41586-021-03426-1.
16. Grint, D. J. *et al.* Case fatality risk of the SARS-CoV-2 variant of concern B.1.1.7 in England. *bioRxiv* (2021) doi:10.1101/2021.03.04.21252528.
17. Tegally, H. *et al.* Emergence and rapid spread of a new severe acute respiratory syndrome-related coronavirus 2 (SARS-CoV-2) lineage with multiple spike mutations in South Africa. *bioRxiv* (2020) doi:10.1101/2020.12.21.20248640.
18. Naveca, F. *et al.* SARS-CoV-2 reinfection by the new Variant of Concern (VOC) P. 1 in Amazonas, Brazil. *virological.org*. Preprint available at: <https://virological.org/t/sars-cov-2-reinfection-by-the-new-variant-of-concern-voc-p-1-in-a-mazonas-brazil/596> (2021).

19. Dejnirattisai, W. *et al.* Antibody evasion by the Brazilian P.1 strain of SARS-CoV-2. *Cold Spring Harbor Laboratory* 2021.03.12.435194 (2021) doi:10.1101/2021.03.12.435194.
20. Weisblum, Y. *et al.* Escape from neutralizing antibodies by SARS-CoV-2 spike protein variants. *Elife* **9**, (2020).
21. Liu, Z. *et al.* Identification of SARS-CoV-2 spike mutations that attenuate monoclonal and serum antibody neutralization. *Cell Host Microbe* **0**, (2021).
22. Greaney, A. J. *et al.* Comprehensive mapping of mutations in the SARS-CoV-2 receptor-binding domain that affect recognition by polyclonal human plasma antibodies. *Cell Host Microbe* **29**, 463-476.e6 (2021).
23. Wibmer, C. K. *et al.* SARS-CoV-2 501Y.V2 escapes neutralization by South African COVID-19 donor plasma. *Nat. Med.* (2021) doi:10.1038/s41591-021-01285-x.
24. Zhou, D. *et al.* Evidence of escape of SARS-CoV-2 variant B.1.351 from natural and vaccine-induced sera. *Cell* (2021) doi:10.1016/j.cell.2021.02.037.
25. Wang, P. *et al.* Increased Resistance of SARS-CoV-2 Variant P. 1 to Antibody Neutralization. *BioRxiv* (2021).
26. Liu, Y. *et al.* Neutralizing Activity of BNT162b2-Elicited Serum. *N. Engl. J. Med.* (2021) doi:10.1056/NEJMc2102017.
27. Garcia-Beltran, W. F. *et al.* Multiple SARS-CoV-2 variants escape neutralization by vaccine-induced humoral immunity. *Cell* (2021) doi:10.1016/j.cell.2021.03.013.
28. West, A. P., Barnes, C. O., Yang, Z. & Bjorkman, P. J. SARS-CoV-2 lineage B.1.526 emerging in the New York region detected by software utility created to query the spike mutational landscape. *Cold Spring Harbor Laboratory* 2021.02.14.431043 (2021) doi:10.1101/2021.02.14.431043.
29. Annavajhala, M. K. *et al.* A novel SARS-CoV-2 variant of concern, B.1.526, identified in New York. *bioRxiv* (2021) doi:10.1101/2021.02.23.21252259.

30. Voloch, C. M. *et al.* Genomic characterization of a novel SARS-CoV-2 lineage from Rio de Janeiro, Brazil. *J. Virol.* (2021) doi:10.1128/JVI.00119-21.
31. Sanders, R. W. & Moore, J. P. Virus vaccines: proteins prefer prolines. *Cell Host Microbe* **29**, 327–333 (2021).
32. Amanat, F. *et al.* Introduction of two prolines and removal of the polybasic cleavage site lead to higher efficacy of a recombinant spike-based SARS-CoV-2 vaccine in the mouse model. *MBio* **12**, (2021).
33. Madhi, S. A. *et al.* Efficacy of the ChAdOx1 nCoV-19 Covid-19 Vaccine against the B.1.351 Variant. *N. Engl. J. Med.* (2021) doi:10.1056/NEJMoa2102214.
34. Logunov, D. Y. *et al.* Safety and immunogenicity of an rAd26 and rAd5 vector-based heterologous prime-boost COVID-19 vaccine in two formulations: two open, non-randomised phase 1/2 studies from Russia. *Lancet* **396**, 887–897 (2020).
35. Dieterle, M. E. *et al.* A Replication-Competent Vesicular Stomatitis Virus for Studies of SARS-CoV-2 Spike-Mediated Cell Entry and Its Inhibition. *Cell Host Microbe* **28**, 486-496.e6 (2020).
36. Li, H. *et al.* Establishment of replication-competent vesicular stomatitis virus-based recombinant viruses suitable for SARS-CoV-2 entry and neutralization assays. *Emerg. Microbes Infect.* **9**, 2269–2277 (2020).
37. Case, J. B. *et al.* Replication-Competent Vesicular Stomatitis Virus Vaccine Vector Protects against SARS-CoV-2-Mediated Pathogenesis in Mice. *Cell Host Microbe* **28**, 465-474.e4 (2020).
38. Baum, A. *et al.* Antibody cocktail to SARS-CoV-2 spike protein prevents rapid mutational escape seen with individual antibodies. *Science* **369**, 1014–1018 (2020).
39. Yahalom-Ronen, Y. *et al.* A single dose of recombinant VSV- $\Delta$ G-spike vaccine provides protection against SARS-CoV-2 challenge. *Nat. Commun.* **11**, 6402 (2020).

40. Greaney, A. J. *et al.* Complete Mapping of Mutations to the SARS-CoV-2 Spike Receptor-Binding Domain that Escape Antibody Recognition. *Cell Host Microbe* **29**, 44-57.e9 (2021).
41. Oguntuyo, K. Y. *et al.* Quantifying absolute neutralization titers against SARS-CoV-2 by a standardized virus neutralization assay allows for cross-cohort comparisons of COVID-19 sera. *MBio* **12**, (2021).
42. Webb, N. E., Montefiori, D. C. & Lee, B. Dose–response curve slope helps predict therapeutic potency and breadth of HIV broadly neutralizing antibodies. *Nat. Commun.* **6**, 1–10 (2015).
43. Collier, D. A. *et al.* Sensitivity of SARS-CoV-2 B.1.1.7 to mRNA vaccine-elicited antibodies. *Nature* **593**, 136–141 (2021).
44. Cai, Y. *et al.* Structural basis for enhanced infectivity and immune evasion of SARS-CoV-2 variants. *bioRxivorg* (2021) doi:10.1101/2021.04.13.439709.
45. Zhu, X. *et al.* Cryo-electron microscopy structures of the N501Y SARS-CoV-2 spike protein in complex with ACE2 and 2 potent neutralizing antibodies. *PLoS Biol.* **19**, e3001237 (2021).
46. Laffeber, C., de Koning, K., Kanaar, R. & Lebbink, J. H. G. Experimental evidence for enhanced receptor binding by rapidly spreading SARS-CoV-2 variants. *bioRxiv* (2021) doi:10.1101/2021.02.22.432357.
47. Finkelstein, M. T. *et al.* Structural analysis of neutralizing epitopes of the SARS-CoV-2 spike to guide therapy and vaccine design strategies. *Viruses* **13**, 134 (2021).
48. Yuan, M. *et al.* Structural and functional ramifications of antigenic drift in recent SARS-CoV-2 variants. *bioRxivorg* (2021) doi:10.1101/2021.02.16.430500.
49. Yin, R. *et al.* Structural and energetic profiling of SARS-CoV-2 antibody recognition and the impact of circulating variants. *bioRxiv* (2021) doi:10.1101/2021.03.21.436311.
50. Gowthaman, R. *et al.* CoV3D: a database of high resolution coronavirus protein structures. *Nucleic Acids Res.* **49**, D282–D287 (2021).

51. Bos, R. *et al.* Ad26 vector-based COVID-19 vaccine encoding a prefusion-stabilized SARS-CoV-2 Spike immunogen induces potent humoral and cellular immune responses. *NPJ Vaccines* **5**, 91 (2020).
52. Walsh, E. E. *et al.* Safety and Immunogenicity of Two RNA-Based Covid-19 Vaccine Candidates. *N. Engl. J. Med.* **383**, 2439–2450 (2020).
53. Corbett, K. S. *et al.* SARS-CoV-2 mRNA vaccine design enabled by prototype pathogen preparedness. *Nature* **586**, 567–571 (2020).
54. Wrapp, D. *et al.* Cryo-EM structure of the 2019-nCoV spike in the prefusion conformation. *Science* **367**, 1260–1263 (2020).
55. Pallesen, J. *et al.* Immunogenicity and structures of a rationally designed prefusion MERS-CoV spike antigen. *Proc. Natl. Acad. Sci. U. S. A.* **114**, E7348–E7357 (2017).
56. Cele, S. *et al.* Escape of SARS-CoV-2 501Y. V2 from neutralization by convalescent plasma. *medRxiv* (2021).
57. Hoffmann, M. *et al.* SARS-CoV-2 variants B.1.351 and P.1 escape from neutralizing antibodies. *Cell* (2021) doi:10.1016/j.cell.2021.03.036.
58. Muik, A. *et al.* Neutralization of SARS-CoV-2 lineage B.1.1.7 pseudovirus by BNT162b2 vaccine-elicited human sera. *Science* **371**, 1152–1153 (2021).
59. Shen, X. *et al.* SARS-CoV-2 variant B.1.1.7 is susceptible to neutralizing antibodies elicited by ancestral spike vaccines. *Cell Host Microbe* (2021) doi:10.1016/j.chom.2021.03.002.
60. Abdool Karim, S. S. & de Oliveira, T. New SARS-CoV-2 Variants — Clinical, Public Health, and Vaccine Implications. *N. Engl. J. Med.* (2021) doi:10.1056/NEJMc2100362.
61. Buchholz, U. J., Finke, S. & Conzelmann, K. K. ... respiratory syncytial virus (BRSV) from cDNA: BRSV NS2 is not essential for virus replication in tissue culture, and the human RSV leader region acts as a functional .... *J. Virol.* (1999).

62. Ramsburg, E. *et al.* A vesicular stomatitis virus recombinant expressing granulocyte-macrophage colony-stimulating factor induces enhanced T-cell responses and is highly attenuated for replication in animals. *J. Virol.* **79**, 15043–15053 (2005).
63. Case, J. B. *et al.* Neutralizing Antibody and Soluble ACE2 Inhibition of a Replication-Competent VSV-SARS-CoV-2 and a Clinical Isolate of SARS-CoV-2. *Cell Host Microbe* **28**, 475-485.e5 (2020).
64. Amanat, F. *et al.* A serological assay to detect SARS-CoV-2 seroconversion in humans. *Nat. Med.* (2020) doi:10.1038/s41591-020-0913-5.
65. Beaty, S. M. *et al.* Efficient and Robust Paramyxoviridae Reverse Genetics Systems. *mSphere* **2**, (2017).
66. Elbe, S. & Buckland-Merrett, G. Data, disease and diplomacy: GISAID's innovative contribution to global health. *Glob Chall* **1**, 33–46 (2017).
67. Shu, Y. & McCauley, J. GISAID: Global initiative on sharing all influenza data - from vision to reality. *Euro Surveill.* **22**, (2017).
